# Supplementary material
Source: publisher figshare collection journal article supplement (https://rs.figshare.com/ndownloader/files/12302414)
Supplement: Supplementary file 1 [file 12302414]

## Sheet: Experiment 2
id	day	trial	block	time of day	posture	condition	postblue weighted	pupil diameter (mm)	response speed (s^-1)	RR-interval (ms)	ln SDNN (ms)	ln RMSSD (ms)	ln SDNN/RMSSD
1	1	1	1	afternoon	upright	baseline	0	5.70327	5.5837	1098.86	3.98599	4.15691	-0.170926
1	1	1	2	afternoon	upright	baseline	0	5.96281	5.32367	1071.17	3.96241	4.10227	-0.139859
1	1	1	4	afternoon	upright	postred	0	6.39584	4.98248	1061.66	4.20631	4.13612	0.0701854
1	1	1	6	afternoon	upright	postblue	1	3.18388	4.89908	1104.87	4.24048	4.28197	-0.0414822
1	1	1	7	afternoon	upright	baseline	0.66667	3.95133	5.15245	1089.39	4.20775	4.14799	0.0597626
1	1	2	1	afternoon	supine	baseline	0	4.88751	4.98082	1179.47	4.14207	4.3595	-0.217423
1	1	2	2	afternoon	supine	baseline	0	5.48835	4.94445	1143.81	4.3586	4.37525	-0.0166537
1	1	2	4	afternoon	supine	postred	0	5.83135	4.59795	1135.91	4.32648	4.33741	-0.0109361
1	1	2	6	afternoon	supine	postblue	1	3.121	4.56176	1099.62	4.15891	4.23032	-0.0714047
1	1	2	7	afternoon	supine	baseline	0.66667	3.69707	4.76347	1124.87	4.28105	4.33863	-0.0575756
1	2	1	1	morning	supine	baseline	0	5.99871	5.04775	1158.24	4.3649	4.49655	-0.131658
1	2	1	2	morning	supine	baseline	0	6.04927	5.01605	1150.03	4.47081	4.50311	-0.0322986
1	2	1	4	morning	supine	postred	0	5.99143	4.97345	1161.4	4.59658	4.74386	-0.147278
1	2	1	6	morning	supine	postblue	1	3.06559	5.00539	1176.14	4.67408	4.86914	-0.195061
1	2	1	7	morning	supine	baseline	0.66667	3.526	4.81727	1148.06	4.6999	4.88325	-0.183351
1	2	2	1	morning	upright	baseline	0	5.13832	5.35769	1120.05	4.35126	4.49931	-0.148043
1	2	2	2	morning	upright	baseline	0	4.67738	5.33292	1084.14	4.15888	4.22775	-0.0688716
1	2	2	4	morning	upright	postred	0	6.08183	4.80296	1033.99	4.29588	4.29422	0.00165401
1	2	2	6	morning	upright	postblue	1	3.10483	4.99603	1050.85	4.55028	4.41781	0.132472
1	2	2	7	morning	upright	baseline	0.66667	3.62662	4.89544	1071.13	4.73041	4.66969	0.0607134
2	1	1	1	afternoon	supine	baseline	0	5.21567	3.57547	1046.73	4.2233	4.09286	0.130437
2	1	1	2	afternoon	supine	baseline	0	5.2854	3.75084	1030.6	4.28441	4.38714	-0.10273
2	1	1	4	afternoon	supine	postred	0	5.2964	3.33844	1043.94	4.42082	4.28472	0.136101
2	1	1	6	afternoon	supine	postblue	1	4.59921	3.46367	983.841	4.66022	4.31001	0.350214
2	1	1	7	afternoon	supine	baseline	0.66667	5.04598	3.41621	993.223	4.29631	4.31211	-0.015806
2	1	2	1	afternoon	upright	baseline	0	5.30016	3.44912	955.485	4.33829	3.96082	0.377474
2	1	2	3	afternoon	upright	postred	0	5.5682	3.26634	953.146	4.09416	4.02586	0.0682976
2	1	2	5	afternoon	upright	postblue	1	3.56243	3.10835	956.384	4.32524	4.24154	0.0837033
2	1	2	6	afternoon	upright	baseline	0.66667	4.60929	3.46309	910.83	4.07715	3.91974	0.157408
2	1	2	7	afternoon	upright	baseline	0.33333	4.64475	3.81118	897.67	4.09459	3.9342	0.160392
2	2	1	1	morning	upright	baseline	0	4.81409	4.04557	1078.93	4.39634	4.60265	-0.206307
2	2	1	2	morning	upright	baseline	0	4.60716	3.93336	1070.02	4.43737	4.45656	-0.0191879
2	2	1	3	morning	upright	baseline	0	4.41622	3.77299	1045.68	4.34878	4.36095	-0.0121686
2	2	1	5	morning	upright	postred	0	4.75957	3.8356	1058.15	4.33452	4.29619	0.0383341
2	2	1	7	morning	upright	postblue	1	3.47364	3.72711	1080.17	4.41874	4.51112	-0.0923854
2	2	2	1	morning	supine	baseline	0	4.24108	3.88789	1310.97	4.79542	5.13189	-0.336471
2	2	2	3	morning	supine	postred	0	4.09013	3.73937	1264.08	4.59191	4.87341	-0.281497
2	2	2	5	morning	supine	postblue	1	2.69372	3.82429	1184.99	4.64166	4.60913	0.0325358
2	2	2	6	morning	supine	baseline	0.66667	3.84928	3.7782	1164.5	4.53017	4.61871	-0.0885394
2	2	2	7	morning	supine	baseline	0.33333	4.15009	3.6784	1112.46	4.55681	4.62722	-0.0704046
3	1	1	1	morning	upright	baseline	0	5.76531	6.44784	905.475	4.10612	3.69884	0.407283
3	1	1	2	morning	upright	baseline	0	5.63571	6.07128	901.416	3.88697	3.44137	0.445602
3	1	1	4	morning	upright	postred	0	5.80587	5.72603	905.956	3.99468	3.46626	0.528419
3	1	1	6	morning	upright	postblue	1	2.79197	5.64095	924.493	3.82749	3.40407	0.423414
3	1	1	7	morning	upright	baseline	0.66667	2.80955	5.3098	938.029	4.05186	3.33617	0.715693
3	1	2	1	morning	supine	baseline	0	5.29811	6.20947	1125.39	3.91768	3.70683	0.21085
3	1	2	3	morning	supine	postred	0	5.95669	6.24751	1086.17	4.14089	3.66843	0.472459
3	1	2	5	morning	supine	postblue	1	2.50554	6.06625	1099.78	3.96782	3.54286	0.424963
3	1	2	6	morning	supine	baseline	0.66667	3.45064	5.6369	1082.81	4.10726	3.61102	0.496243
3	1	2	7	morning	supine	baseline	0.33333	4.71032	5.97291	1104.8	4.29926	3.60308	0.696171
3	2	1	1	afternoon	supine	baseline	0	6.04441	5.86557	1144.77	4.03187	3.7481	0.283769
3	2	1	3	afternoon	supine	postred	0	6.19245	5.60689	1106.27	3.7647	3.55182	0.212876
3	2	1	5	afternoon	supine	postblue	1	2.49815	5.48337	1076.07	3.8657	3.47317	0.392532
3	2	1	6	afternoon	supine	baseline	0.66667	3.63572	4.85948	1111.52	4.21534	3.6491	0.566239
3	2	1	7	afternoon	supine	baseline	0.33333	5.31025	5.66708	1082.37	4.15027	3.5245	0.625762
3	2	2	1	afternoon	upright	baseline	0	6.5701	6.31294	911.261	3.92343	3.26419	0.659242
3	2	2	2	afternoon	upright	baseline	0	6.56108	6.0111	936.727	3.9627	3.33507	0.627632
3	2	2	3	afternoon	upright	baseline	0	6.553	5.98928	924.724	4.11449	3.34273	0.77176
3	2	2	5	afternoon	upright	postred	0	6.32925	6.01162	947.05	4.23822	3.18804	1.05018
3	2	2	7	afternoon	upright	postblue	1	3.14962	5.60043	963.57	3.96718	3.23922	0.727959
4	1	1	1	morning	supine	baseline	0	4.95022	4.43099	1099.2	4.62043	4.89138	-0.270952
4	1	1	2	morning	supine	baseline	0	4.17146	3.84218	1084.01	4.63463	4.92458	-0.289948
4	1	1	3	morning	supine	baseline	0	4.3437	3.69738	1007.19	4.54108	4.75387	-0.21279
4	1	1	5	morning	supine	postred	0	5.6606	3.35551	1047.14	4.42207	4.58866	-0.166588
4	1	1	7	morning	supine	postblue	1	2.57551	3.3142	992.047	4.28803	4.40253	-0.114507
4	1	2	1	morning	upright	baseline	0	4.37445	3.80224	851.868	3.89087	3.68466	0.206216
4	1	2	3	morning	upright	postred	0	4.83013	3.61448	843.026	3.77035	3.64985	0.120499
4	1	2	5	morning	upright	postblue	1	2.31882	3.30264	824.406	3.7349	3.50852	0.226377
4	1	2	6	morning	upright	baseline	0.66667	2.73607	3.31205	859.914	3.76278	3.64566	0.11712
4	1	2	7	morning	upright	baseline	0.33333	3.36063	3.35868	864.192	3.80052	3.7254	0.0751165
4	2	1	1	afternoon	upright	baseline	0	4.01611	4.41591	880.007	3.88234	3.78098	0.101363
4	2	1	3	afternoon	upright	postred	0	5.13657	3.77999	843.659	3.9441	3.69177	0.25233
4	2	1	5	afternoon	upright	postblue	1	2.3857	3.65202	826.584	3.89758	3.62841	0.269175
4	2	1	6	afternoon	upright	baseline	0.66667	2.70231	3.6888	851.072	4.06108	3.84474	0.216341
4	2	1	7	afternoon	upright	baseline	0.33333	2.98515	3.75343	853.33	3.94789	3.75158	0.196304
4	2	2	1	afternoon	supine	baseline	0	4.33396	4.21501	1076.41	4.37722	4.67693	-0.299706
4	2	2	3	afternoon	supine	postred	0	5.73745	3.93881	1023.78	4.39409	4.4541	-0.0600074
4	2	2	5	afternoon	supine	postblue	1	2.60251	3.93513	1035.95	4.50062	4.53269	-0.0320687
4	2	2	6	afternoon	supine	baseline	0.66667	3.52457	3.68376	1054.17	4.49753	4.5937	-0.0961739
4	2	2	7	afternoon	supine	baseline	0.33333	3.35592	3.44536	1075.6	4.44245	4.70397	-0.261521
5	1	1	1	afternoon	upright	baseline	0	2.78885	5.11745	757.589	3.9857	3.54212	0.443579
5	1	1	2	afternoon	upright	baseline	0	3.24059	4.59459	745.83	4.01961	3.37289	0.64672
5	1	1	3	afternoon	upright	baseline	0	3.70434	4.40476	741.873	4.09591	3.48361	0.612299
5	1	1	5	afternoon	upright	postred	0	3.63384	4.1324	762.733	3.92094	3.46301	0.45793
5	1	1	7	afternoon	upright	postblue	1	2.67177	4.12355	780.815	3.94637	3.5086	0.437768
5	1	2	1	afternoon	supine	baseline	0	3.26822	5.05513	755.344	4.06436	3.68413	0.380237
5	1	2	2	afternoon	supine	baseline	0	3.01713	4.78935	751.885	4.04036	3.63758	0.402773
5	1	2	3	afternoon	supine	baseline	0	3.20465	4.96024	750.016	4.09453	3.55503	0.539507
5	1	2	5	afternoon	supine	postred	0	3.8635	4.80704	751.745	4.07574	3.62031	0.455431
5	1	2	7	afternoon	supine	postblue	1	2.54059	4.33497	760.005	4.20818	3.60929	0.598888
5	2	1	1	morning	supine	baseline	0	4.08036	5.57476	787.835	4.08662	3.79928	0.287347
5	2	1	3	morning	supine	postred	0	4.54561	4.97378	732.002	4.08573	3.6879	0.397833
5	2	1	5	morning	supine	postblue	1	2.55584	4.96364	726.166	4.21357	3.63381	0.579754
5	2	1	6	morning	supine	baseline	0.66667	2.94996	4.46664	729.04	3.87206	3.53894	0.333116
5	2	1	7	morning	supine	baseline	0.33333	3.04284	4.06646	762.645	4.2921	3.89298	0.399117
5	2	2	1	morning	upright	baseline	0	4.46191	5.25013	781.618	3.96849	3.52914	0.439351
5	2	2	2	morning	upright	baseline	0	3.551	4.94277	735.324	3.81253	3.22178	0.590744
5	2	2	3	morning	upright	baseline	0	4.07844	4.8103	749.656	4.07568	3.43806	0.637628
5	2	2	5	morning	upright	postred	0	4.75892	4.3581	735.175	3.93688	3.18054	0.75634
5	2	2	7	morning	upright	postblue	1	2.54987	4.81314	747.542	3.79016	3.26477	0.525391
6	1	1	1	morning	upright	baseline	0	5.67857	3.29571	917.281	3.44792	3.63636	-0.188441
6	1	1	2	morning	upright	baseline	0	5.72392	3.31644	896.164	3.80144	3.75334	0.0481011
6	1	1	4	morning	upright	postred	0	6.17423	2.90184	915.391	3.62752	3.69651	-0.0689828
6	1	1	6	morning	upright	postblue	1	3.72232	2.88493	964.886	4.01712	3.86293	0.15419
6	1	1	7	morning	upright	baseline	0.66667	4.74046	2.94911	963.089	3.82718	3.89763	-0.0704511
6	1	2	1	morning	supine	baseline	0	5.64629	3.46647	997.602	4.50783	4.49983	0.00800157
6	1	2	2	morning	supine	baseline	0	5.11531	3.16553	992.705	4.05109	4.23431	-0.183214
6	1	2	3	morning	supine	baseline	0	5.31395	3.2675	967.847	4.28433	4.3618	-0.0774743
6	1	2	5	morning	supine	postred	0	5.89252	3.0049	937.785	4.53868	4.37322	0.165461
6	1	2	7	morning	supine	postblue	1	4.52984	2.58571	989.612	4.35661	4.31268	0.0439309
6	2	1	1	afternoon	supine	baseline	0	5.24961	3.20852	947.184	4.13081	4.07782	0.0529952
6	2	1	2	afternoon	supine	baseline	0	5.32592	3.36647	968.602	4.2293	4.19427	0.0350377
6	2	1	3	afternoon	supine	baseline	0	5.12699	2.9608	976.267	4.1918	4.29106	-0.0992568
6	2	1	5	afternoon	supine	postred	0	5.56282	3.08668	1000.75	4.16057	4.24189	-0.0813241
6	2	1	7	afternoon	supine	postblue	1	3.38113	3.104	960.509	4.56629	4.43465	0.131638
6	2	2	1	afternoon	upright	baseline	0	5.09121	3.42769	812.323	3.65108	3.59347	0.0576108
6	2	2	2	afternoon	upright	baseline	0	5.15592	3.53307	833.152	3.98016	3.64849	0.331665
6	2	2	4	afternoon	upright	postred	0	5.84541	3.03237	844.218	3.9394	3.74723	0.192178
6	2	2	6	afternoon	upright	postblue	1	3.37066	3.00351	860.87	3.7392	3.69648	0.0427292
6	2	2	7	afternoon	upright	baseline	0.66667	4.75065	2.92636	874.365	3.99731	3.81365	0.183665
7	1	1	1	morning	upright	baseline	0	4.56509	4.44151	794.001	3.85432	3.26406	0.590253
7	1	1	2	morning	upright	baseline	0	4.97652	4.67223	769.323	3.54832	3.01944	0.528885
7	1	1	3	morning	upright	baseline	0	4.58309	4.67089	779.796	3.55466	3.06114	0.493519
7	1	1	5	morning	upright	postred	0	6.63146	4.04629	772.857	3.61879	2.99188	0.626919
7	1	1	7	morning	upright	postblue	1	2.86026	4.0873	788.36	3.58574	3.10795	0.47779
7	1	2	1	morning	supine	baseline	0	3.51384	4.44295	855.18	4.02201	3.22444	0.797565
7	1	2	2	morning	supine	baseline	0	3.53417	4.34225	865.253	3.63861	3.22715	0.41146
7	1	2	3	morning	supine	baseline	0	3.48016	4.17272	866.197	3.86648	3.28676	0.579717
7	1	2	5	morning	supine	postred	0	5.44909	3.96587	838.844	4.05987	3.24533	0.814541
7	1	2	7	morning	supine	postblue	1	2.70621	3.97477	869.141	3.99017	3.16795	0.822213
7	2	1	1	afternoon	supine	baseline	0	4.64136	4.52028	799.427	3.54142	3.75806	-0.216647
7	2	1	3	afternoon	supine	postred	0	5.10663	4.24703	802.463	3.78919	3.26354	0.525647
7	2	1	5	afternoon	supine	postblue	1	2.11744	3.87252	807.805	3.76273	3.52969	0.233038
7	2	1	6	afternoon	supine	baseline	0.66667	2.47588	4.13122	835.47	3.85695	3.45003	0.406921
7	2	1	7	afternoon	supine	baseline	0.33333	2.37236	3.86176	836.056	4.10668	3.40546	0.701226
7	2	2	1	afternoon	upright	baseline	0	3.68117	4.26544	856.3	3.77264	3.54666	0.225974
7	2	2	2	afternoon	upright	baseline	0	4.54693	3.94354	852.475	3.80846	3.3683	0.440162
7	2	2	3	afternoon	upright	baseline	0	4.2589	3.8732	852.516	4.01016	3.40403	0.606132
7	2	2	5	afternoon	upright	postred	0	4.96163	3.75321	799.079	4.34133	3.55287	0.788464
7	2	2	7	afternoon	upright	postblue	1	2.65663	3.66736	830.72	3.9022	3.40006	0.502138
8	1	1	1	afternoon	upright	baseline	0	3.61292	3.52036	857.831	3.94275	3.6356	0.307143
8	1	1	2	afternoon	upright	baseline	0	3.4551	3.3462	854.015	4.05494	3.70273	0.352207
8	1	1	3	afternoon	upright	baseline	0	3.66009	3.11266	816.468	4.05042	3.49364	0.556787
8	1	1	5	afternoon	upright	postred	0	4.20977	2.89239	853.599	4.40661	3.88342	0.523189
8	1	1	7	afternoon	upright	postblue	1	2.39429	2.95422	899.131	4.32058	3.80669	0.51389
8	1	2	1	afternoon	supine	baseline	0	3.16946	3.31422	1044.89	4.58408	4.78814	-0.204061
8	1	2	2	afternoon	supine	baseline	0	2.97353	3.07443	1021.76	4.67239	4.75197	-0.0795741
8	1	2	4	afternoon	supine	postred	0	2.91317	2.82854	1030.4	4.53533	4.6252	-0.08987
8	1	2	6	afternoon	supine	postblue	1	2.25835	3.4286	1052.23	4.54664	4.72115	-0.174511
8	1	2	7	afternoon	supine	baseline	0.66667	2.52055	3.29852	1021.46	4.37178	4.55028	-0.178499
8	2	1	1	morning	supine	baseline	0	4.34372	3.96118	850.628	4.11835	3.73167	0.386684
8	2	1	2	morning	supine	baseline	0	4.09444	3.65766	857.627	3.93972	3.67665	0.26307
8	2	1	4	morning	supine	postred	0	4.97097	3.24822	862.365	3.8361	3.71724	0.118856
8	2	1	6	morning	supine	postblue	1	2.61479	3.25933	924.028	4.17121	4.10213	0.06908
8	2	1	7	morning	supine	baseline	0.66667	2.67838	3.41544	915.474	4.32996	3.90452	0.425439
8	2	2	1	morning	upright	baseline	0	3.84966	3.30543	833.487	3.74266	3.59403	0.148622
8	2	2	2	morning	upright	baseline	0	3.69229	3.16048	810.608	3.8019	3.40744	0.394451
8	2	2	4	morning	upright	postred	0	4.78589	3.20591	844.704	4.1859	3.79038	0.395514
8	2	2	6	morning	upright	postblue	1	2.73556	2.94928	859.945	4.16512	3.80416	0.360963
8	2	2	7	morning	upright	baseline	0.66667	2.82102	3.0565	838.621	4.0512	3.52112	0.530081
9	1	1	1	afternoon	supine	baseline	0	4.08279	4.96199	801.243	4.6049	4.02247	0.58243
9	1	1	2	afternoon	supine	baseline	0	4.93272	5.03523	794.922	4.22963	3.88964	0.339994
9	1	1	4	afternoon	supine	postred	0	5.18177	4.98769	760.709	4.1611	3.52204	0.639059
9	1	1	6	afternoon	supine	postblue	1	2.73344	4.72885	796.603	4.34072	3.84081	0.49991
9	1	1	7	afternoon	supine	baseline	0.66667	2.93899	4.40217	848.021	4.32137	3.93726	0.384111
9	1	2	1	afternoon	upright	baseline	0	4.82304	4.75957	743.342	4.11838	3.42956	0.688813
9	1	2	2	afternoon	upright	baseline	0	4.45629	4.52585	739.481	4.18323	3.51896	0.664279
9	1	2	4	afternoon	upright	postred	0	6.12811	4.19137	717.817	4.24474	3.50832	0.736425
9	1	2	6	afternoon	upright	postblue	1	2.77719	4.37455	767.253	4.21418	3.56232	0.651861
9	1	2	7	afternoon	upright	baseline	0.66667	4.16589	4.36176	755.613	4.28572	3.64364	0.642077
9	2	1	1	morning	upright	baseline	0	4.89895	4.80949	924.342	4.16705	3.81766	0.349391
9	2	1	3	morning	upright	postred	0	5.52361	4.53928	929.09	4.15069	3.71194	0.438753
9	2	1	5	morning	upright	postblue	1	2.80391	4.33797	901.328	4.2918	3.7628	0.528999
9	2	1	6	morning	upright	baseline	0.66667	3.11435	4.50826	959.381	4.29486	3.82253	0.472329
9	2	1	7	morning	upright	baseline	0.33333	3.51131	4.32493	951.926	4.25643	3.87738	0.379052
9	2	2	1	morning	supine	baseline	0	4.27193	4.66389	1011.66	4.44898	4.33043	0.118551
9	2	2	2	morning	supine	baseline	0	4.35265	4.5676	1020.91	4.62031	4.44244	0.177869
9	2	2	4	morning	supine	postred	0	4.86463	4.25108	980.649	4.82256	4.20059	0.621965
9	2	2	6	morning	supine	postblue	1	2.66971	4.15578	1009.35	4.59033	4.35446	0.235873
9	2	2	7	morning	supine	baseline	0.66667	3.03	4.45107	1058.95	4.70938	4.42519	0.284192
10	1	1	1	afternoon	supine	baseline	0	6.03647	4.42626	1012.88	4.4334	4.49996	-0.0665554
10	1	1	2	afternoon	supine	baseline	0	6.20592	4.15015	1087.25	4.32368	4.56224	-0.238565
10	1	1	3	afternoon	supine	baseline	0	6.14087	4.12818	1051.79	4.45913	4.37302	0.0861112
10	1	1	5	afternoon	supine	postred	0	6.22711	4.24794	1117.65	4.42443	4.3362	0.0882279
10	1	1	7	afternoon	supine	postblue	1	3.64746	3.60985	1095.3	4.80676	4.78497	0.0217908
10	1	2	1	afternoon	upright	baseline	0	5.36453	4.00866	926.889	4.55028	4.62538	-0.0751014
10	1	2	3	afternoon	upright	postred	0	6.28989	3.88464	898.232	4.45053	4.47557	-0.0250474
10	1	2	5	afternoon	upright	postblue	1	2.87317	4.01267	872.345	4.42385	4.21355	0.210298
10	1	2	6	afternoon	upright	baseline	0.66667	4.89742	3.80406	911.505	4.49354	4.4005	0.0930384
10	1	2	7	afternoon	upright	baseline	0.33333	5.87349	3.88723	921.484	4.55401	4.51691	0.0371051
10	2	1	1	morning	upright	baseline	0	6.53743	3.57946	854.006	4.06539	3.98677	0.0786243
10	2	1	3	morning	upright	postred	0	6.62324	3.76556	861.048	4.20173	4.02517	0.176559
10	2	1	5	morning	upright	postblue	1	3.65813	3.41796	883.416	4.22813	4.06186	0.166275
10	2	1	6	morning	upright	baseline	0.66667	5.33673	3.46162	881.681	4.11765	3.97262	0.145023
10	2	1	7	morning	upright	baseline	0.33333	6.18762	3.38718	888.556	4.30458	4.01753	0.287044
10	2	2	1	morning	supine	baseline	0	5.75045	3.82704	1096.96	4.66077	4.75638	-0.0956142
10	2	2	2	morning	supine	baseline	0	5.74728	4.0655	1063.19	4.58828	4.73739	-0.149118
10	2	2	3	morning	supine	baseline	0	5.67777	3.75495	1085.51	4.52439	4.58706	-0.0626635
10	2	2	5	morning	supine	postred	0	5.80696	3.83383	1095.05	4.88164	4.77985	0.101794
10	2	2	7	morning	supine	postblue	1	4.20916	4.00585	1078.39	4.48246	4.6878	-0.205342
11	1	1	1	morning	supine	baseline	0	5.4252	3.73626	821.945	4.28242	4.01708	0.265341
11	1	1	3	morning	supine	postred	0	5.70906	3.57081	822.588	4.45859	4.13917	0.31942
11	1	1	5	morning	supine	postblue	1	3.14198	3.33404	861.564	4.45847	4.21317	0.245302
11	1	1	6	morning	supine	baseline	0.66667	3.81863	3.43924	879.58	4.53531	4.27759	0.257719
11	1	1	7	morning	supine	baseline	0.33333	3.26761	3.53695	922.666	4.36544	4.28068	0.084765
11	1	2	1	morning	upright	baseline	0	4.55406	3.1619	846.978	4.14863	3.9543	0.194332
11	1	2	2	morning	upright	baseline	0	4.34822	3.00198	812.104	4.29098	3.95762	0.33336
11	1	2	3	morning	upright	baseline	0	4.6643	3.34521	821.441	4.36618	3.96333	0.402855
11	1	2	5	morning	upright	postred	0	5.56385	2.9759	814.011	4.41849	4.19667	0.221818
11	1	2	7	morning	upright	postblue	1	3.28865	3.1573	846.299	4.2995	4.28159	0.0179159
11	2	1	1	afternoon	upright	baseline	0	4.79463	3.67799	860.733	4.24801	3.96682	0.281192
11	2	1	3	afternoon	upright	postred	0	5.39129	3.33295	829.79	4.50755	3.97116	0.536385
11	2	1	5	afternoon	upright	postblue	1	3.60151	3.24169	870.808	4.55932	4.19212	0.367195
11	2	1	6	afternoon	upright	baseline	0.66667	4.52797	3.25051	832.872	4.70936	4.33605	0.373313
11	2	1	7	afternoon	upright	baseline	0.33333	4.44039	3.05369	832.004	4.48698	4.11301	0.373961
11	2	2	1	afternoon	supine	baseline	0	3.66474	2.9647	1039.83	4.9602	4.6929	0.267294
11	2	2	3	afternoon	supine	postred	0	4.58301	2.4345	1048.27	5.18665	4.68627	0.500385
11	2	2	5	afternoon	supine	postblue	1	3.23151	2.9455	960.73	4.71482	4.52886	0.185964
11	2	2	6	afternoon	supine	baseline	0.66667	4.13561	3.40605	1014.07	4.66188	4.6035	0.0583861
11	2	2	7	afternoon	supine	baseline	0.33333	5.2385	3.60488	1008.13	4.56207	4.52367	0.0384017
12	1	1	1	morning	supine	baseline	0	3.88391	4.89943	932.754	3.70759	3.70383	0.00375989
12	1	1	2	morning	supine	baseline	0	4.22345	4.26438	925.489	4.05929	3.66785	0.391438
12	1	1	4	morning	supine	postred	0	4.95853	4.02031	905.078	4.2724	3.51592	0.756479
12	1	1	6	morning	supine	postblue	1	2.42331	4.40204	934.163	3.73311	3.54368	0.189438
12	1	1	7	morning	supine	baseline	0.66667	3.50192	3.70573	888.826	4.17405	3.53114	0.642909
12	1	2	1	morning	upright	baseline	0	3.70922	4.23132	805.42	3.65095	3.22176	0.429188
12	1	2	2	morning	upright	baseline	0	3.92242	3.89205	779.263	3.69644	3.04235	0.654085
12	1	2	3	morning	upright	baseline	0	3.90672	3.68489	818.484	3.70055	3.17045	0.5301
12	1	2	5	morning	upright	postred	0	4.26377	3.61796	737.921	3.77379	3.01768	0.756107
12	1	2	7	morning	upright	postblue	1	2.31137	4.43704	827.023	3.74498	3.32044	0.42454
12	2	1	1	afternoon	upright	baseline	0	3.55151	4.34937	736.113	3.20164	2.85218	0.349456
12	2	1	2	afternoon	upright	baseline	0	3.74577	4.33351	724.743	3.34516	2.77847	0.566687
12	2	1	4	afternoon	upright	postred	0	5.45374	4.34889	749.125	3.82173	3.17561	0.646121
12	2	1	6	afternoon	upright	postblue	1	2.53328	4.39848	780.721	3.71523	3.20559	0.50964
12	2	1	7	afternoon	upright	baseline	0.66667	3.93203	4.03825	775.104	4.02601	3.41045	0.615556
12	2	2	1	afternoon	supine	baseline	0	3.78238	4.5472	783.933	3.63698	3.02954	0.607444
12	2	2	3	afternoon	supine	postred	0	4.68341	3.62674	799.722	3.69472	3.20632	0.488398
12	2	2	5	afternoon	supine	postblue	1	2.37715	4.0517	808.576	3.80926	3.14636	0.662909
12	2	2	6	afternoon	supine	baseline	0.66667	3.06648	3.69848	793.85	3.88295	3.25769	0.625254
12	2	2	7	afternoon	supine	baseline	0.33333	3.76966	3.80057	829.4	3.7965	3.43583	0.360674

## Sheet: Participant characteristics
id	sex	age (y)
1	male	29
2	female	24
3	male	33
4	female	25
5	male	31
6	female	23
7	male	26
8	female	22
9	male	23
10	female	25
11	male	23
12	female	29
